# Supplementary material for: Effects of Dimerization, Dendrimerization, and Chirality in p-BthTX-I Peptide Analogs on the Antibacterial Activity and Enzymatic Inhibition of the SARS-CoV-2 PLpro Protein
Source: MDPI journal article supplement (doi:10.3390/pharmaceutics15020436), 2023-01-28
Supplement: s1 [file s1]

# Supplementary Materials: Effects of Dimerization, Dendrimerization, and Chirality in p-BthTX-I Peptide Analogs on the Antibacterial Activity and Enzymatic Inhibition of the SARS-CoV-2 PL<sup>pro</sup> Protein

Natália Vitória Bitencourt, Gabriela Marinho Righetto, Ilana Lopes Baratella Cunha Camargo, Mariana Ortiz de Godoy, Rafael Victorio Carvalho Guido, Glaucius Oliva, Norival Alves Santos-Filho and Eduardo Maffud Cilli

## Synthesis and characterization of the peptides

The peptides were manually synthesized by solid-phase using the Fmoc (9-fluorenylmethyloxycarbonyl) protocol. The synthesis was performed using Rink Amide resin (0.55 mmol g<sup>-1</sup>, AAPTEC) to obtain the peptide in alpha-carboxamide form after the cleavage step. Briefly, deprotection of the Fmoc group was performed in 20% 4-methylpiperidine in dimethylformamide (DMF) by 1 and 20 min. Fmoc-amino acids were coupled using diisopropylcarbodiimide (DIC)/N-hydroxybenzotriazole (HOBt) in DMF for 2 h stirring, with 2-fold excess for all coupling reagents. If necessary, O-(benzotriazol-1-yl)-N,N,N',N'-tetramethyluronium hexafluorophosphate (HBTU)/diisopropylethylamine (DIEA) in DMF was used. The dimer and tetramer analogs (L and D isomers) were obtained using the previously described strategy [1] using one (for dimers) or 3 (for tetramers) Fmoc-Lys(Fmoc)-OH in the C-terminal region. The chains of peptides were simultaneously elongated grown up in  $\alpha$ - and  $\epsilon$ -amino groups, obtaining homo dimers and tetramers. The cleavage of the peptide from the resin was performed for 2 h using 95% TFA, 2.5 TIS (triisopropylsilane) and 2.5 water, at a ratio of 10 mL/g resin. The crude peptides were precipitated with chilled ethyl ether, separated from soluble nonpeptide material by centrifugation, and lyophilized. Purification of the synthetic peptides was performed in a semi-preparative mode using a C18 reverse-phase column (AAPTEC 1.0  $\times$  25 cm). The purity was determined on a C18 reverse-phase (0.46  $\times$  25 cm) analytical column (Agilent, Santa Clara, CA, USA). The solvents were 0.045% TFA in deionized water and 0.036% TFA in acetonitrile with 1 mL/min with a linear gradient of 5–95% solvent B (0.036% (v/v) TFA/acetonitrile) for 30 min. The chromatograms and mass spectra of the peptides are showed in Figure S1–S6. The mass spectrometry which indicated the molecular mass of the cation/charge ratio of the identified peptides' analysis was carried out. The mass spectra of these peptides were evaluated, and the synthesis was confirmed (Table S1).

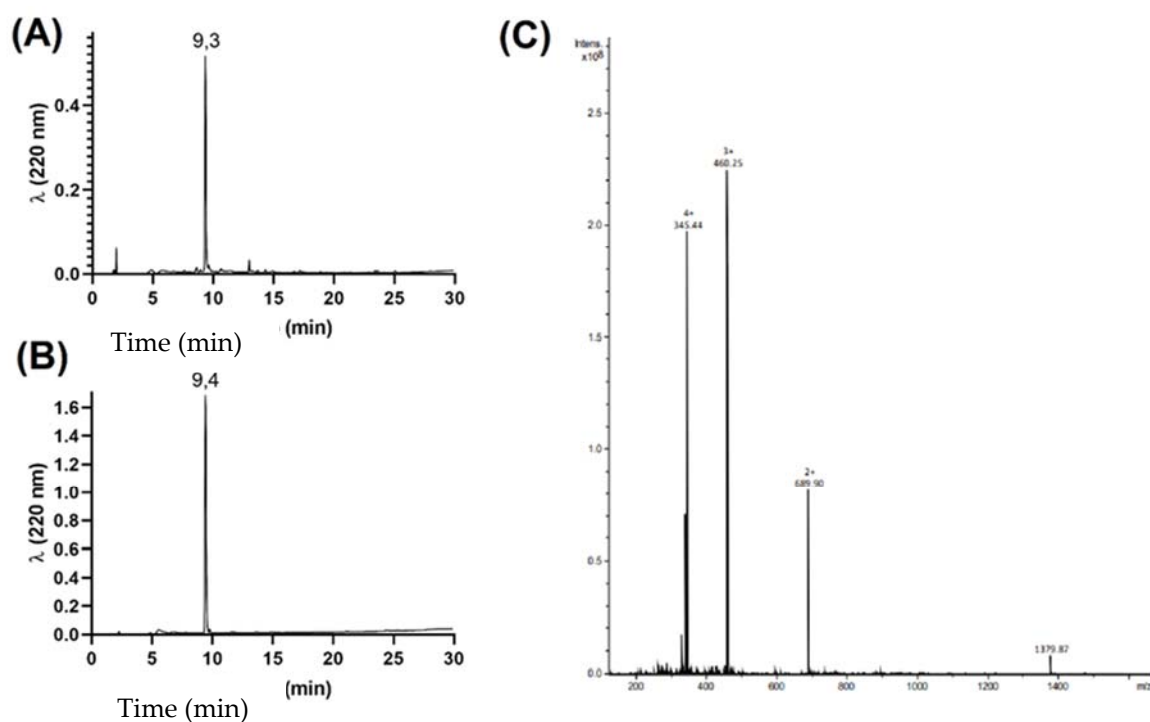

**Figure S1.** Chromatogram of the crude (a) and purified KKYRYHLKPF (L-monomer) peptide (b) - analytical reverse phase Phenomenex Jupiter C18 column (150  $\times$  4.6 mm), packed with spherical 5 mm particle and 300 Å pore size, using a linear gradient of 5–95% (v/v) of solvent B for 30 min, at a flow rate of 1.0 mL/min and UV detection at 220 nm. Mass spectrum of the peptide (c) - Thermo LCQ-fleet mass spectrometer, with ESI-IT-MS configuration. Direct infusion of the sample solutions was carried out at a concentration of about 10 ppm in acetonitrile/water containing 0.1% v/v formic acid. The infusion flow was adjusted to 5.0  $\mu$ L/min and the electrospray source was operated in positive mode, applying 4.5 kV to the electrospray capillary.

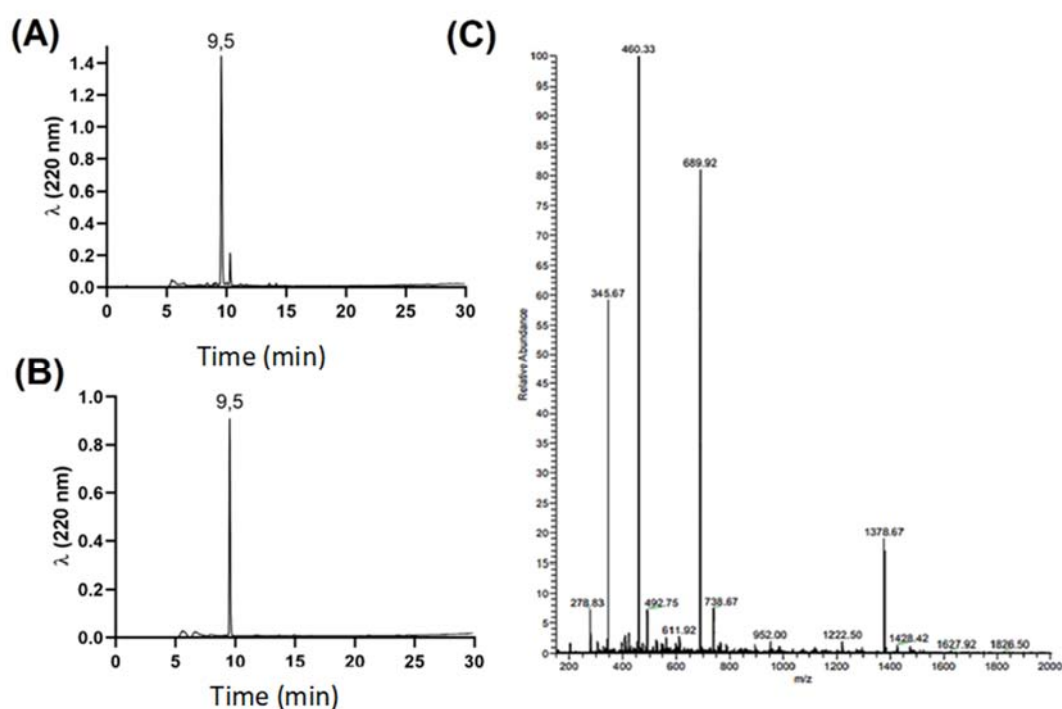

**Figure S2.** Chromatogram of the crude (a) and purified kkyryhlkpf (D-monomer) peptide (b) - analytical reverse phase Phenomenex Jupiter C18 column (150  $\times$  4.6 mm), packed with spherical 5 mm

particle and 300 Å pore size, using a linear gradient of 5–95% (v/v) of solvent B for 30 min, at a flow rate of 1.0 mL/min and UV detection at 220 nm. Mass spectrum of the peptide (c) - Thermo LCQ-fleet mass spectrometer, with ESI-IT-MS configuration. Direct infusion of the sample solutions was carried out at a concentration of about 10 ppm in acetonitrile/water containing 0.1% v/v formic acid. The infusion flow was adjusted to 5.0 µL/min and the electrospray source was operated in positive mode, applying 4.5 kV to the electrospray capillary.

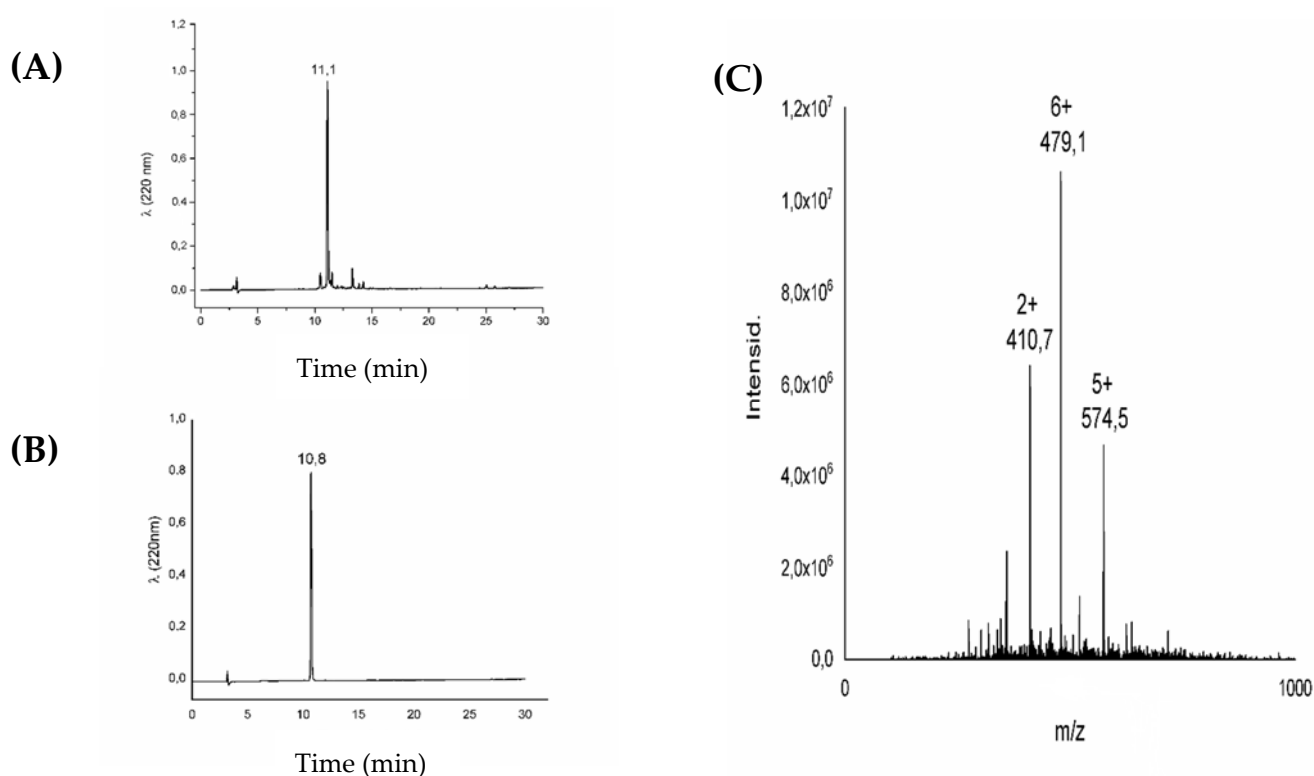

**Figure S3.** Chromatogram of the crude (a) and purified (KKYRYHLKPF)<sub>2</sub>K (L-dimer) peptide (b) - analytical reverse phase Phenomenex Jupiter C18 column (150 x 4.6 mm), packed with spherical 5 mm particle and 300 Å pore size, using a linear gradient of 5–95% (v/v) of solvent B for 30 min, at a flow rate of 1.0 mL/min and UV detection at 220 nm. Mass spectrum of the peptide (c) - Thermo LCQ-fleet mass spectrometer, with ESI-IT-MS configuration. Direct infusion of the sample solutions was carried out at a concentration of about 10 ppm in acetonitrile/water containing 0.1% v/v formic acid. The infusion flow was adjusted to 5.0 µL/min and the electrospray source was operated in positive mode, applying 4.5 kV to the electrospray capillary.

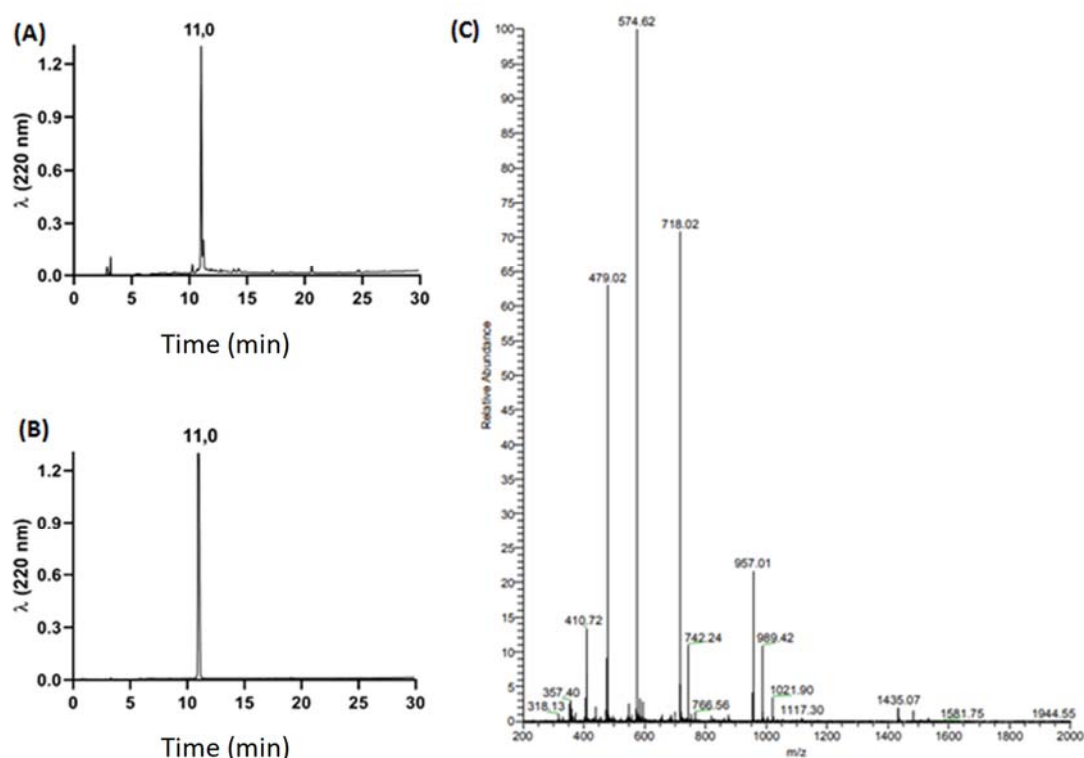

**Figure S4.** Chromatogram of the crude (a) and purified (kkyryhlkpf)<sub>2</sub>K (D-dimer) peptide (b) - analytical reverse phase Phenomenex Jupiter C18 column (150 × 4.6 mm), packed with spherical 5 mm particle and 300 Å pore size, using a linear gradient of 5–95% (v/v) of solvent B for 30 min, at a flow rate of 1.0 mL/min and UV detection at 220 nm. Mass spectrum of the peptide (c) - Thermo LCQ-fleet mass spectrometer, with ESI-IT-MS configuration. Direct infusion of the sample solutions was carried out at a concentration of about 10 ppm in acetonitrile/water containing 0.1% v/v formic acid. The infusion flow was adjusted to 5.0 µL/min and the electrospray source was operated in positive mode, applying 4.5 kV to the electrospray capillary.

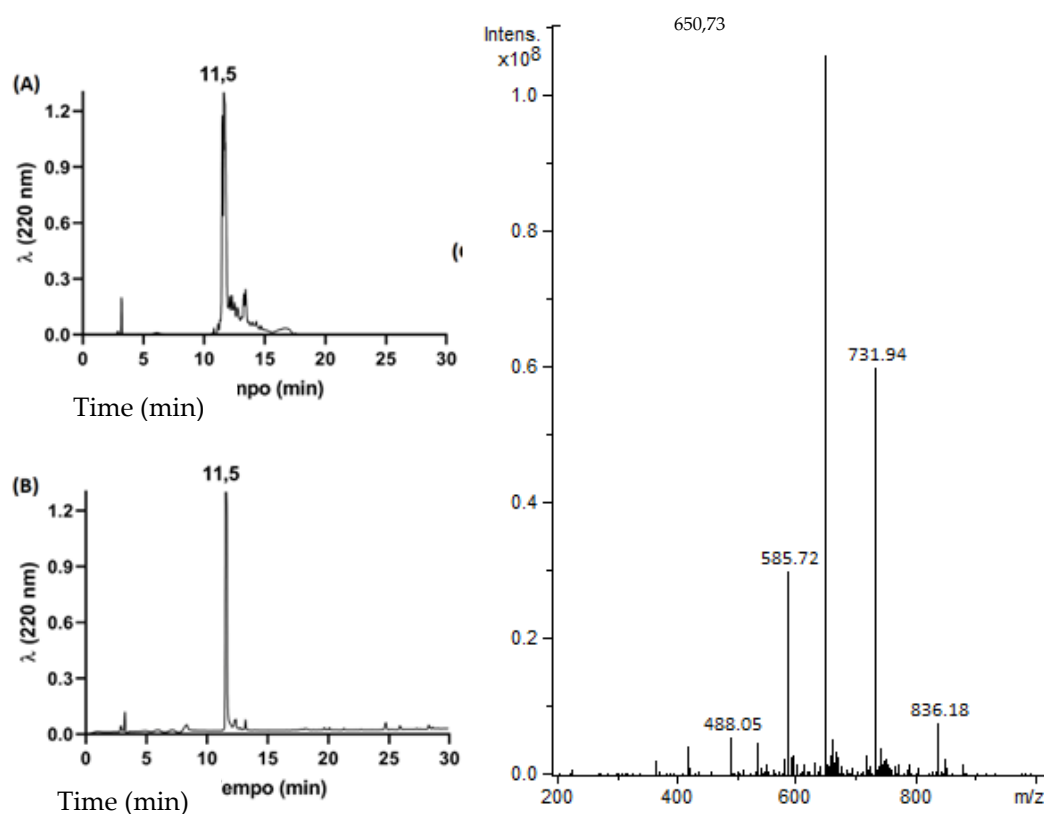

**Figure S5.** Chromatogram of the crude (a) and purified (KKYRYHLKPF)<sub>4</sub>K<sub>2</sub>K (L-tetramer) peptide (b) - analytical reverse phase Phenomenex Jupiter C18 column (150 × 4.6 mm), packed with spherical 5 mm particle and 300 Å pore size, using a linear gradient of 5–95% (v/v) of solvent B for 30 min, at a flow rate of 1.0 mL/min and UV detection at 220 nm. Mass spectrum of the peptide (c) - Thermo LCQ-fleet mass spectrometer, with ESI-IT-MS configuration. Direct infusion of the sample solutions was carried out at a concentration of about 10 ppm in acetonitrile/water containing 0.1% v/v formic acid. The infusion flow was adjusted to 5.0 µL/min and the electrospray source was operated in positive mode, applying 4.5 kV to the electrospray capillary.

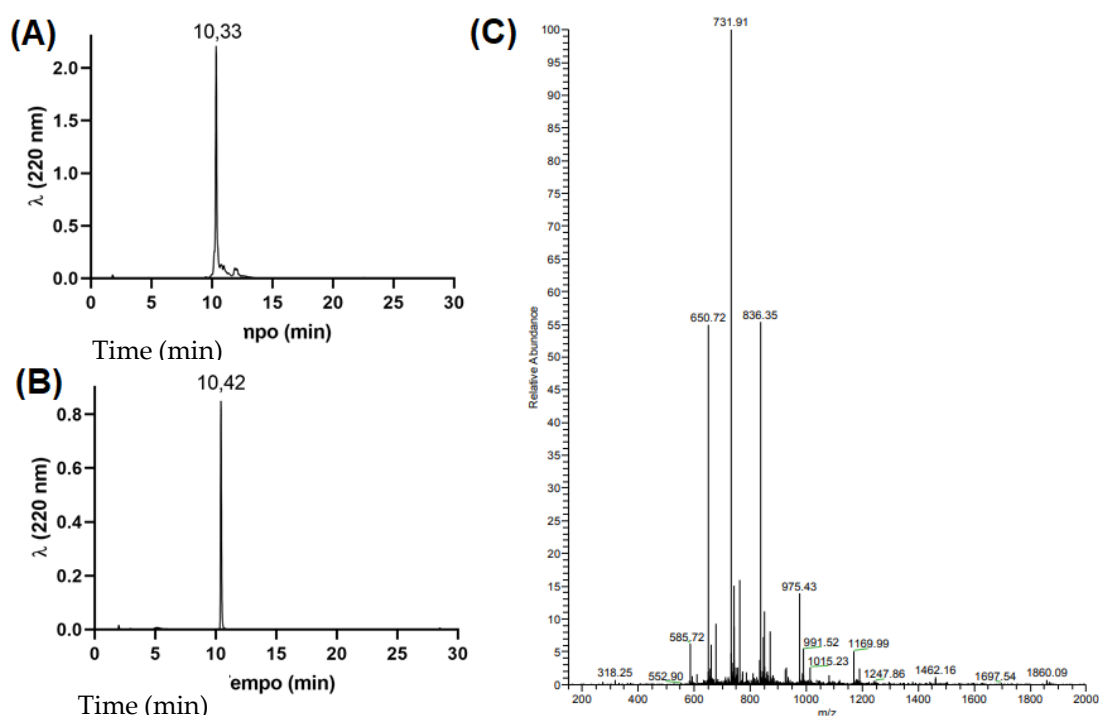

**Figure S6.** Chromatogram of the crude (a) and purified (kkyryhlkpf)<sub>4</sub>K<sub>2</sub>K (D-tetramer) peptide (b) - analytical reverse phase Phenomenex Jupiter C18 column (150 × 4.6 mm), packed with spherical 5 mm particle and 300 Å pore size, using a linear gradient of 5–95% (v/v) of solvent B for 30 min, at a flow rate of 1.0 mL/min and UV detection at 220 nm. Mass spectrum of the peptide (c) - Thermo LCQ-fleet mass spectrometer, with ESI-IT-MS configuration. Direct infusion of the sample solutions was carried out at a concentration of about 10 ppm in acetonitrile/water containing 0.1% v/v formic acid. The infusion flow was adjusted to 5.0 µL/min and the electrospray source was operated in positive mode, applying 4.5 kV to the electrospray capillary.

**Table S1.** Molecular weight and mass/charge ratio of the synthetic peptides.

| eptide     | MW<br>g/mol | mass/charge ratio |         |          |
|------------|-------------|-------------------|---------|----------|
|            |             | Peak 1            | Peak 2  | Peak 3   |
| L-monomer  | 1378.7      | 690.4/2           | 460.6/3 | 345.7/4  |
| D-monomer  | 1378.7      | 690.4/2           | 460.6/3 | 345.7/4  |
| L-dimer    | 2868.5      | 574.7/5           | 479.1/6 | 410.8/7  |
| D-dimer    | 2868.5      | 718.1/4           | 574.7/5 | 479.1/6  |
| L-tetramer | 5848.1      | 732.0/8           | 650.8/9 | 585.8/10 |
| D-tetramer | 5848.1      | 836.4/7           | 732.0/8 | 650.8/9  |

### PL<sup>pro</sup> Inhibition Assays

Our findings indicated that the analogs showed comparable inhibition profiles [2] and IC<sub>50</sub> values. The inhibition profiles of L-dimer, D-dimer and L-tetramer was published

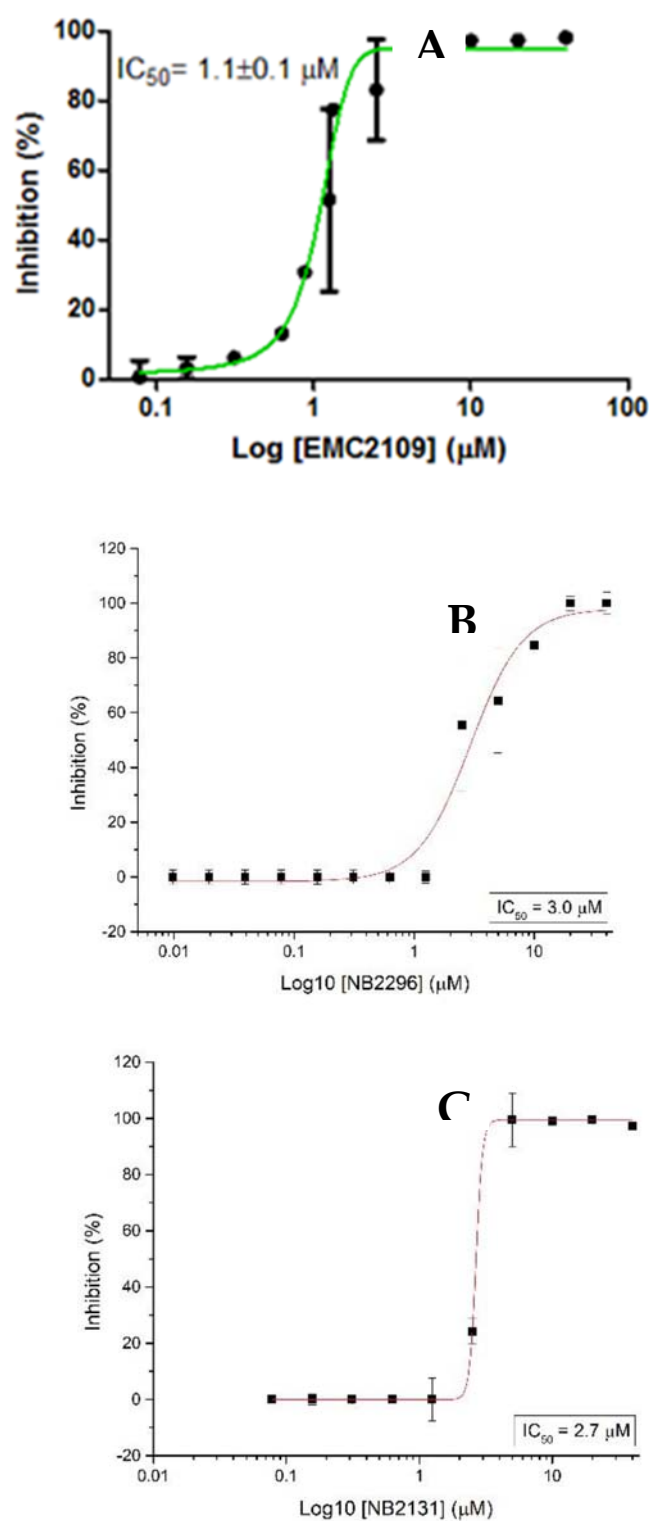

**Figure S7.** Representative concentration–response inhibition curves against PL<sup>pro</sup> from SARS-CoV-2 for L-monomer (A), D-monomer and D-tetramer. Two independent experiments were done.

1. Santos-Filho, N. A.; Righetto, G. M.; Pereira, M. R.; Piccoli, J. P.; Almeida, L. M. T.; Leal, T. C.; Camargo, I. L. B. C.; Cilli, E. M. Effect of C-terminal and N-terminal dimerization and alanine scanning on antibacterial activity of the analogs of the peptide p-BthTX-I. *Peptide Science*, **2022**, *114*:e24243, 1-10. DOI: 10.1002/pep2.24243.
2. Freire, M. C.; Noske, G. D.; Bitencourt, N. V.; Sanches, P. R.; Santos-Filho, N. A.; Gawriljuk, V. O.; Souza E. P.; Nogueira, V. H. R.; Godoy, M. O.; Nakamura, A. M.; Fernandes, R. S.; Godoy, A. S.; Juliano, M. A.; Peres, B. M.; Barbosa, C. G.; Moraes, C. B.; Freitas-Junior, L. H. G.; Cilli, E. M.; Guido, R. V. C.; Oliva, G. Non-Toxic Dimeric Peptides Derived from the Bothropstoxin-I Are Potent SARS-CoV-2 and Papain-like Protease Inhibitors. *Molecules*, **2021**, *26*(16), 4896.
